# Supplementary material for: Using ‘sentinel’ plants to improve early detection of invasive plant pathogens
Source: PLOS journal article supplement (doi:10.1371/journal.pcbi.1010884), 2023-02-02
Supplement: S13 (10.1371/journal.pcbi.1010884.s013) [file journal.pcbi.1010884.s013]

# Using ‘sentinel’ plants to improve early detection of invasive plant pathogens

Francesca A. Lovell-Read, Stephen Parnell, Nik J. Cuniffe, Robin N. Thompson

**S7 Fig.**

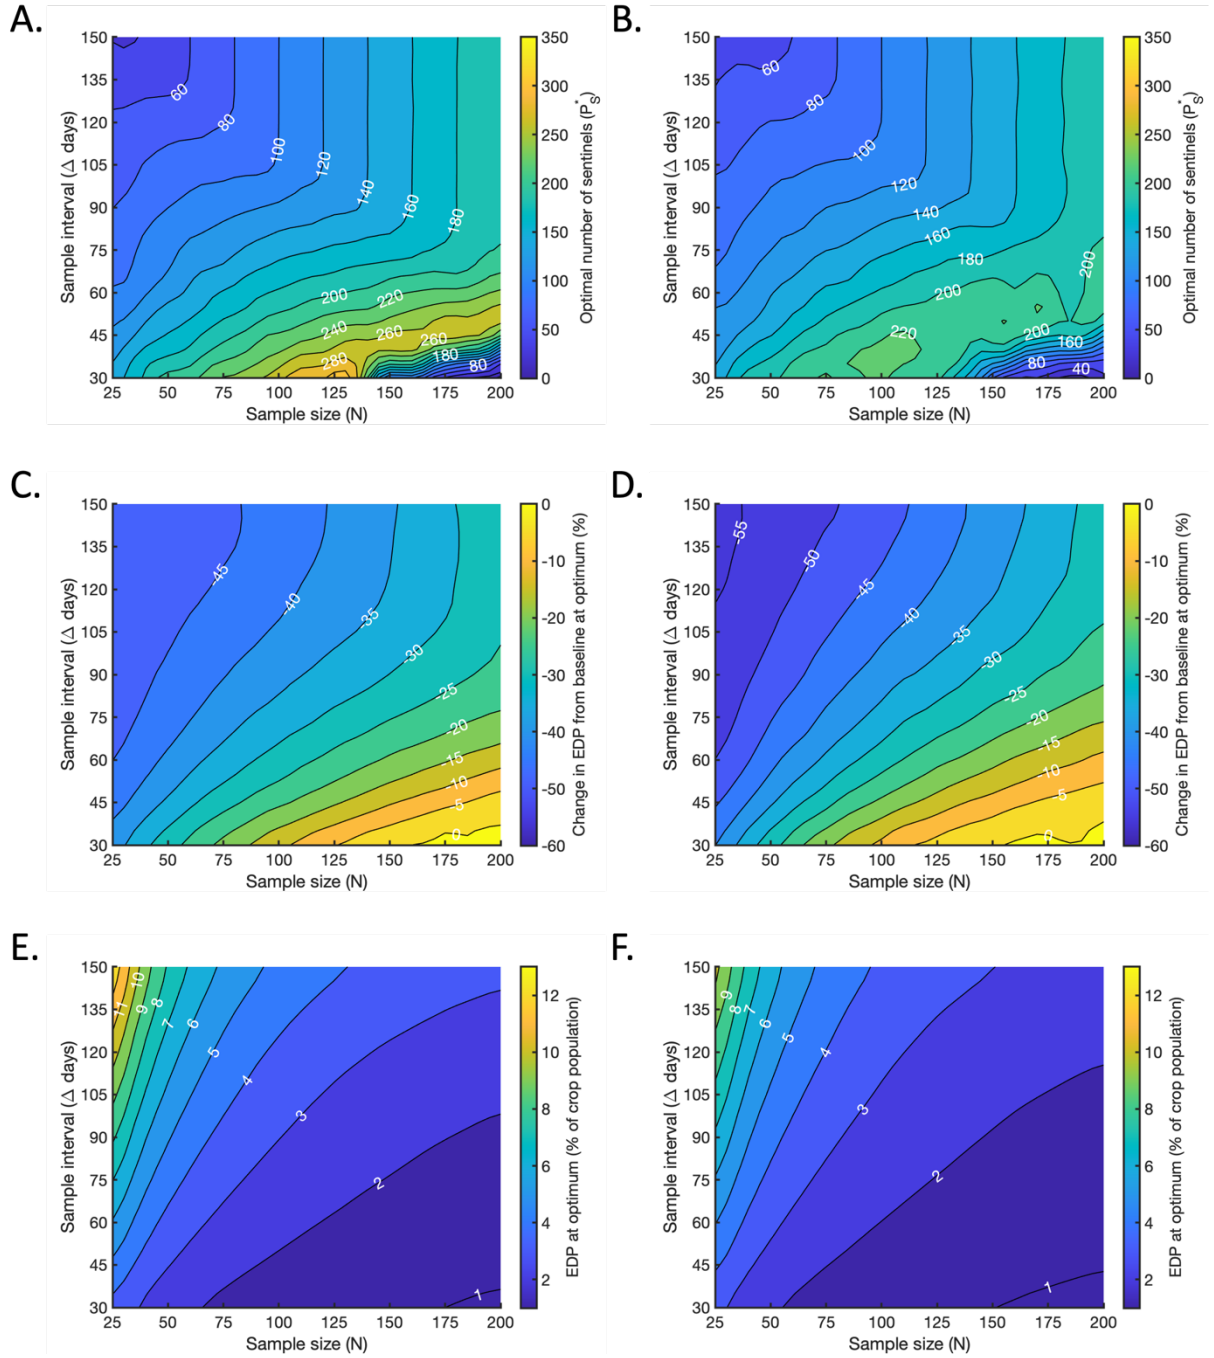

**S7 Fig.** The effect of varying the mean duration of the crop ‘Undetectable’ period from  $\gamma_c = 452$  days (baseline value) to  $\gamma_c = 350$  days (A,C,E) and to  $\gamma_c = 550$  days (B,D,F). Panels analogous to Fig 5 in the main text. A,B. The optimal number  $P_S^*$  of sentinel plants to include in the population, for which the maximal reduction in the EDP compared to the baseline level is achieved (if  $N_S$  is also chosen optimally). C,D. The percentage change in the EDP compared to the baseline value at the optimum, achieved when  $P_S = P_S^*$  and  $N_S = N_S^*$ . E,F. The resultant value of the EDP at the optimum, expressed as a percentage of the total crop population.
